# Supplementary material
Source: Springer Nature journal article supplement (https://www.springermedizin.de/resource/supplementary/12950_2009_133_MOESM5_ESM.pdf/9558032)

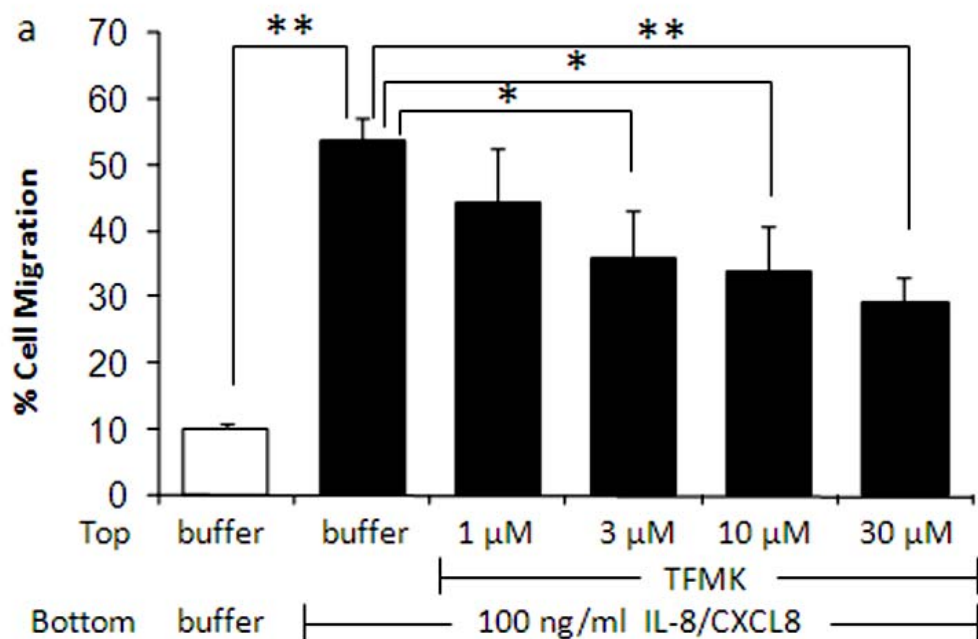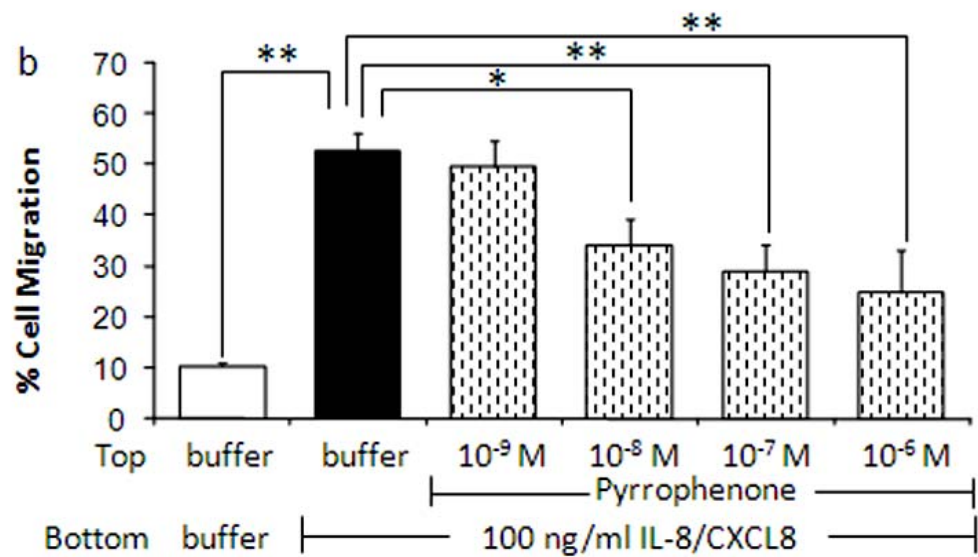

Supplement: MOESM5 [file 9558032]
